# Supplementary material for: Reef Odor: A Wake Up Call for Navigation in Reef Fish Larvae
Source: PubMed Central journal article supplement (PMC3755995; doi:10.1371/journal.pone.0072808), 2013-08-28
Supplement: pone.0072808.s001.pdf [file pone.0072808.s001.pdf]

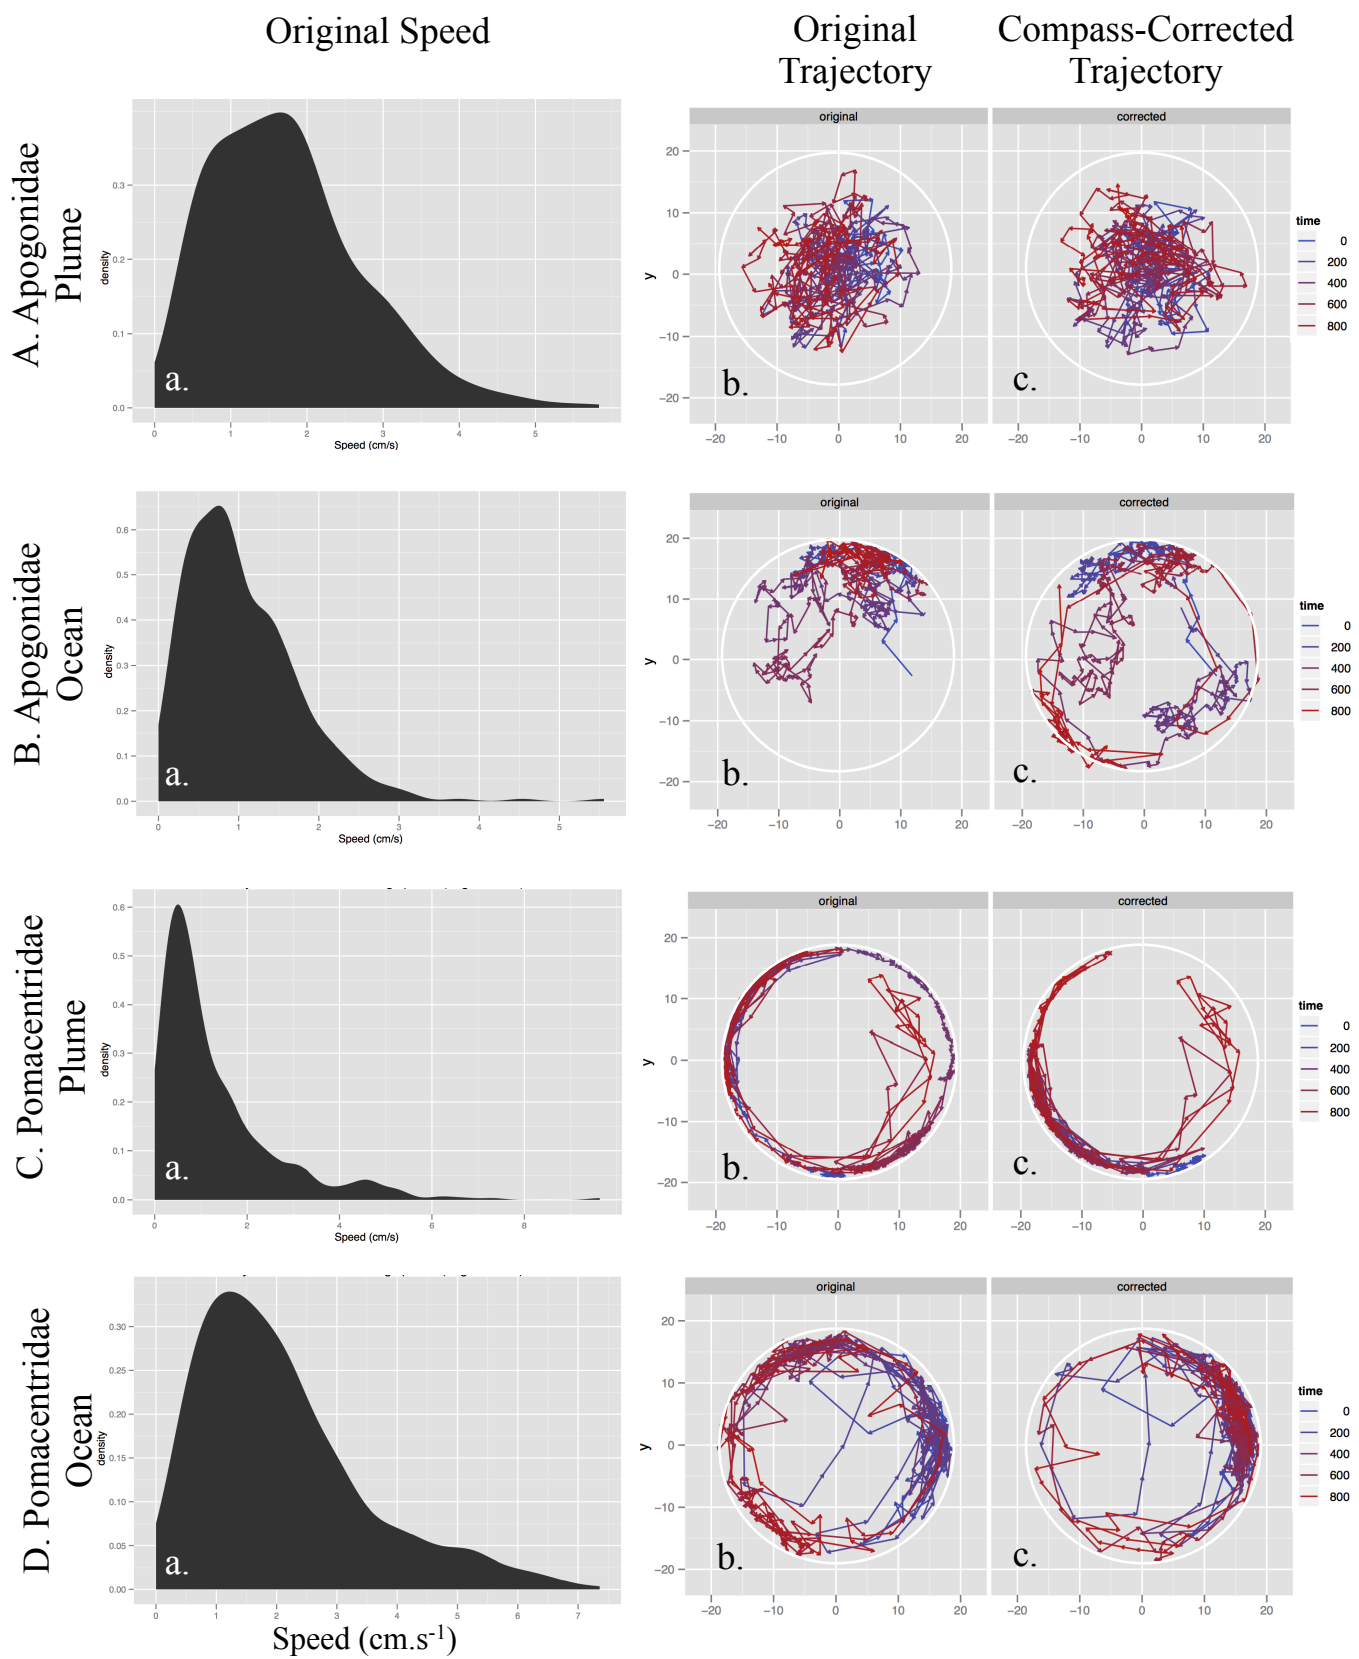

x

Figure S1
